# Supplementary material for: Sweet success: ionic liquids derived from non-nutritive sweetenersElectronic supplementary information (ESI) available: experimental details; IR spectra. See http://www.rsc.org/suppdata/cc/b3/b313068a/
Source: Royal Society of Chemistry journal article supplement (doi:10.1039/b313068a), 2004-01-01
Supplement: b313068a.doc [file b313068a.doc]

**Electronic Supporting Information**

**Table 1. Equilibrium Data for Determining Relative Anion Affinity for Rh(PPh3)2(CO)+**

***trans*-Rh(PPh3)2(CO)X + [N(PPh3)2]Z = *trans*-Rh(PPh3)2(CO)Z + [N(PPh3)2]X**

| X | Z | K | Method |
| --- | --- | --- | --- |
| Sac | TFA | 0.091(9) | 19F |
| Sac | 3,5-F2C6H3CO2 | 2.5(3) | 31P |
| Sac | 3-FC6H4CO2 | 31(3) | 19F and 31P |
| Sac | CH3CO2, | 58(6) | 31P |
| Ace | TFA | 12(2) | 19F and 31P |

Concentrations of equilibrium participants measured by multiple manual integration of pertinent

resonances in CDCl3. Uncertainties are assigned at 5% accuracy in mean integral values.

**Table 2. Spectroscopic Data for Pertinent *trans*-Rh(PPh3)2(CO)X**

| X | (Rh-C≡O), cm-1 | δ 31P (ppm) | 1JRh-P, Hz | 2JP-Rh-CO, Hz | δ 13C (Rh-C≡O; ppm) | 1JRh-CO, Hz |
| --- | --- | --- | --- | --- | --- | --- |
| Sac | 1987 | 31.88 | 130 | 16.6 | 189.33 | 69.4 |
| TFA | 1982 | 31.90 | 132 | 17.3 | 190.57 | 71.5 |
| Ace | 1980 | 33.17 | 133 | 16.9 | 190.25 | 71.5 |
| ONO2 | 1984 | 31.14 | 133 | 17.0 | 191.44 | 73.3 |

IR spectra in CH2Cl2 (CaF2 cells); NMR spectra in C6D6

**Pertinent Experimental Details on Metal Complex and Spectroscopy Experiments**

A typical anion-metathesis equilibrium experiment is described. A mixture of solid {Rh}Ace (16.3 mg, 0.0203 mmol) and [N(PPh3)2]TFA (12.5 mg, 0.0192 mmol) was dissolved in 0.75 mL CDCl3 (stored over MolSieve 3A and Ag foil under N2). The resulting clear yellow solution was transferred into an NMR tube with minimal exposure to moisture and its 31P{1H} and 19F NMR spectra recorded on a JEOL Eclipse 300-MHz spectrometer at 121.7 and 282.8 MHz, respectively. No difference in relative integrals was observed for 19F signals for {Rh}TFA (δ -74.742) and TFA**-** (δ -74.377) using 4-s and 12-s pulse delays. Four manual integrations for each spectrum afforded mean {Rh}TFA/ TFA**-** integral ratios of 1.10 for 19F and 1.06 for 31P.

Similar experiments using {Rh}Sac and [N(PPh3)2]3-FC6H4CO2 afforded well-resolved signals for {Rh}O2CArF (δ -116.19) and O2CArF**-** (δ -115.55).

Other 13C NMR for {Rh}Sac in δ, with relative peak heights: 166.21 (s, 0.2), 144.47 (s, 0.3), 134.90 (t, 4.5; J = 6.6 Hz), 133.07 (t, 1.1; J = 22.5 Hz), 130.50 (s, 0.7), 130.40 (s, 0.7), 130.02 (s, 3.7), 128.96 (t, 0.4; J = 4.5), 128.56 (s, 0.4), 122.44 (s, 0.6), 119.09 (s, 0.6).

Other 13C NMR for {Rh}Ace in δ, with relative peak heights: 171.57 (s, 1), 160.84 (s, 2), 134.76 (t, 11; J = 6.6 Hz), 132.09 (t, 3; J = 22.5 Hz), 130.24 (s, 11), 128.48 (t, 0.4; J = 4.5), 100.23 (s, 2).

**General Synthetic Approach and Product Characteristics for the Sweetener Ionic Liquids**

Each ionic liquid was prepared by the combination of equimolar amounts of the sodium salt of the particular sweetener with a halide salt of the target cation. For all syntheses of ionic liquids except those involving the butyryl choline cation, the reactions were carried out in reagent grade acetone. The latter were conducted in 50/50 (v/v) water-acetone mixtures, using the silver salt of the requisite sweetener (see below). The solids (generally scaling from 10g of sweetener) were combined in 100mL of acetone and stirred overnight. The precipitated solids (NaX) were removed by filtration, and the crude ionic liquids isolated by stripping the acetone in vacuo. Those that were room-temperature solids were recrystallized from a solution of IL in absolute ethanol or methanol. Glassy IL and those that are room-temperature liquids were purified by column chromatography on silica gel using a gradient solvent system of dichloromethane and acetonitrile. All IL used for the metal complexation and spectrochemical studies were purified chromatographically. Each IL was checked for residual halide using AgNO3, and those batches giving a positive test were repeatedly re-crystallized or chromatographed until the test was negative. The viscosities of the ionic liquids that were liquid at room-temperature were generally similar to high-grade automotive motor oil.

The silver salts of saccharin and acesulfame are readily prepared by the combination of equimolar quantities of the sweetener sodium or potassium salt with silver nitrate in water. The resulting white precipitate is filtered, washed with water and ethanol, then air dried, making provision for shielding the salt from light. The slightly photosensitive salts are stored in opaque bottles.
